# Supplementary material for: microRNAs 424 and 503 are mediators of the anti-proliferative and anti-invasive action of the thyroid hormone receptor beta
Source: PubMed Central journal article supplement (PMC4102780; doi:10.18632/oncotarget.1577), 2014-04-02
Supplement: oncotarget-05-2918-s001.pdf [file oncotarget-05-2918-s001.pdf]

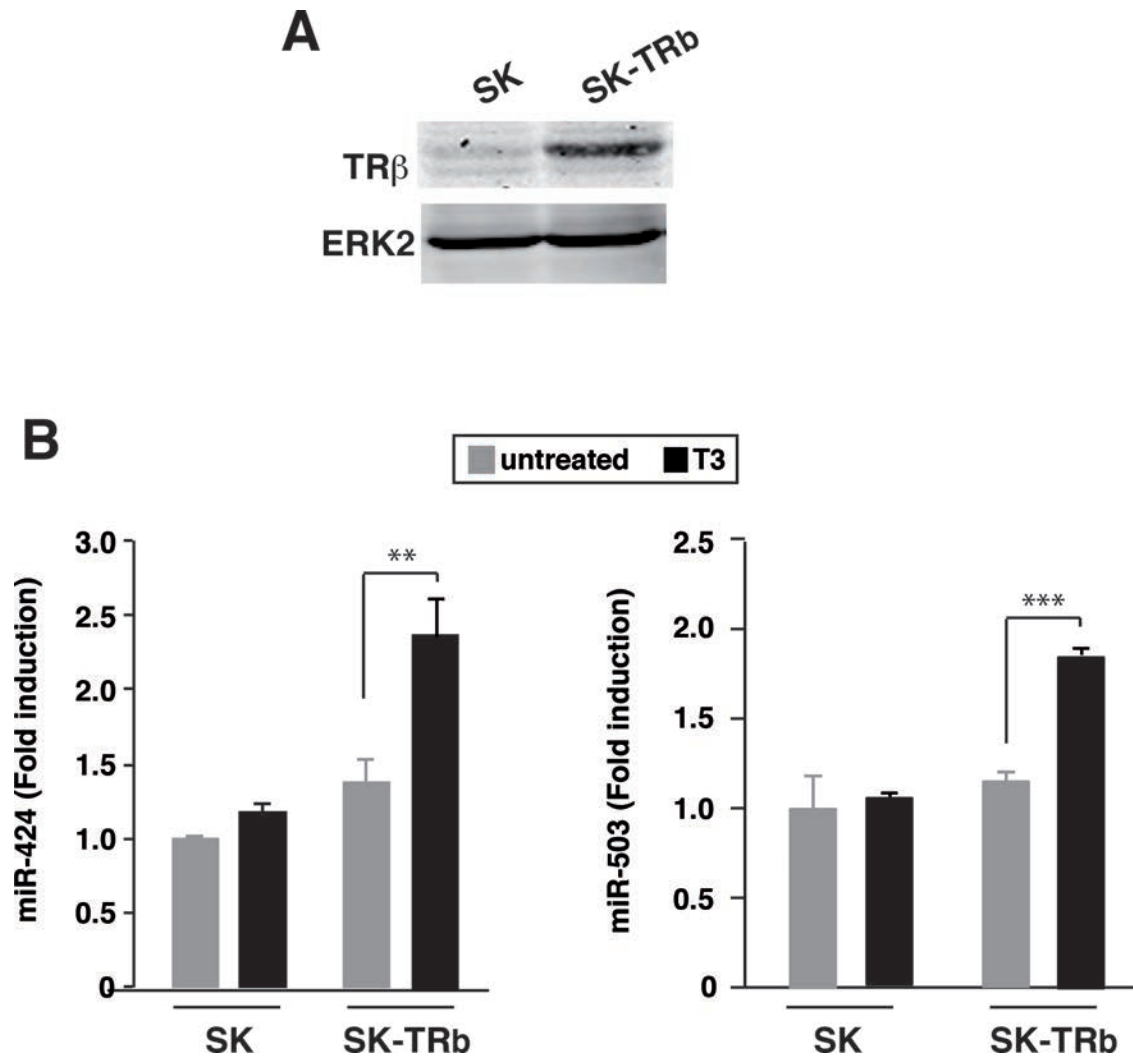

**Supplementary Figure S1:** (A) The levels of TR $\beta$  were determined by western blot in parental SK-hep1 hepatocarcinoma cells (SK) and in cells stably transfected with TR $\beta$  (SK-TRb). ERK2 was used as a loading control. (B) miR-424 and miR-503 levels were measured after 36 h of incubation in the presence and absence of 5 nM T3 in SK and SK-TRb cells. Results are expressed as fold induction with respect to the untreated parental cells. Statistically significant differences between untreated and T3-treated cells are indicated with asterisks.

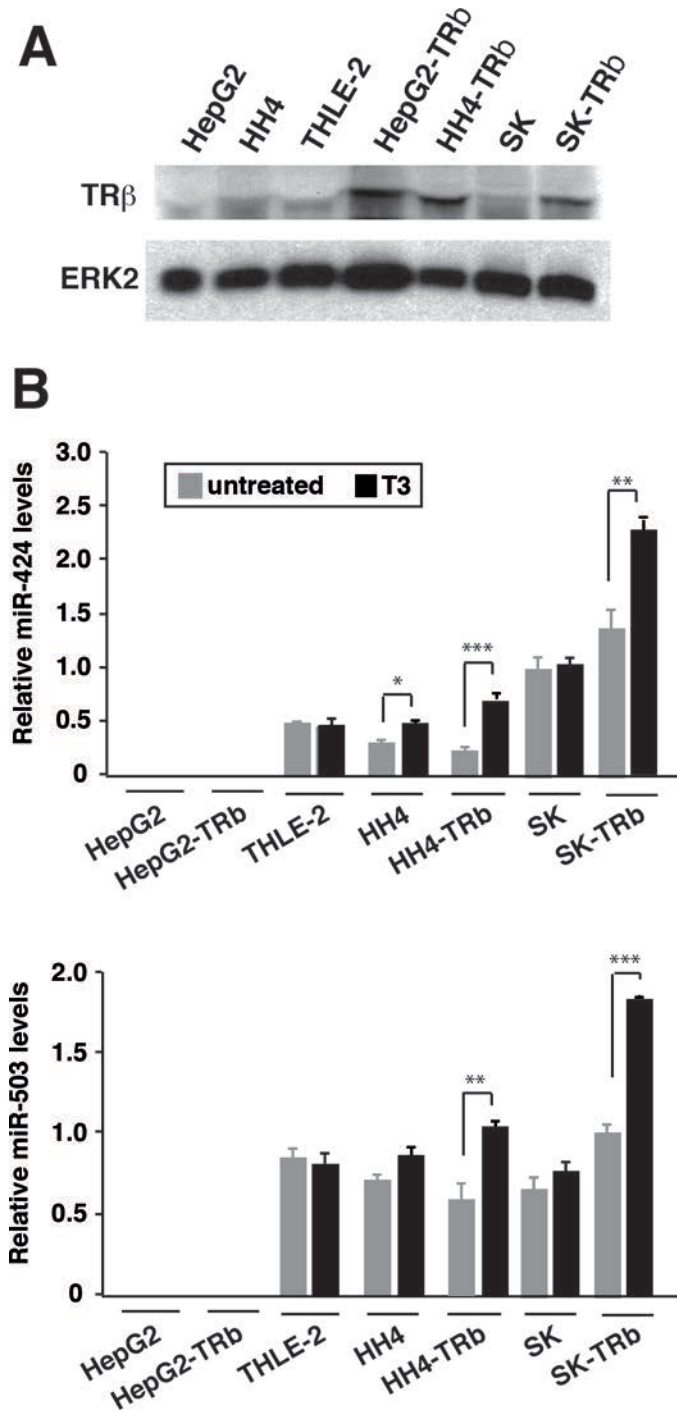

**Supplementary Figure S2:** (A) The levels of TR $\beta$  were determined by western blot in the parental cell lines and in cells stably transfected with TR $\beta$ . ERK2 was used as a loading control. (B) miR-424 and miR-503 levels were determined after 36 h of incubation in the presence and absence of 5 nM T3 in the cells indicated. Results are expressed as the percentage to the values obtained in untreated SK-TR $\beta$  cells. Statistically significant differences between untreated and T3-treated cells are shown with asterisks.

**Cdc25 3'-UTR**

UGUGGUACUGGGGCUGCUGCUA 660/679  
 | | | | |  
**CGACGA** seed sequence

GAAGUUACACAGAAAUGCUGCUG 352/370  
 | | | | |  
**CGACGA**

**c-Myb 3'-UTR**

AAAACGUUUUUUGCUGCUA 643/661  
 | | | | |  
**CGACGA**

UUAGCCUGUAGACAUGCUGCUA 667/688  
 | | | | |  
**CGACGA**

**Chk1 3'-UTR**

UGGUGAAUAUAGUGCUGCUA 26/45  
 | | | | |  
**CGACGA**

**Wee1 3'-UTR**

CCACUGUGGUGGUGUGCUGCUA 251/272  
 | | | | |  
**CGACGA**

AUUGCCUUGUGAAUUUGCUGCUA 529/551  
 | | | | |  
**CGACGA**

UAUGUGAAAUGUAUAGCUGCUU 628/649  
 | | | | |  
**CGACGA**

**Supplementary Figure S3: Sequences of the 3'-UTRs of Cdc25, c-Myb, Chk1 and Wee1 mRNAs containing putative binding sites for miR-424 and miR-503.** The position of the nucleotides is shown at the right and the seed sequence of the miRNA family annealing with the 3'-UTRs is shown in red.

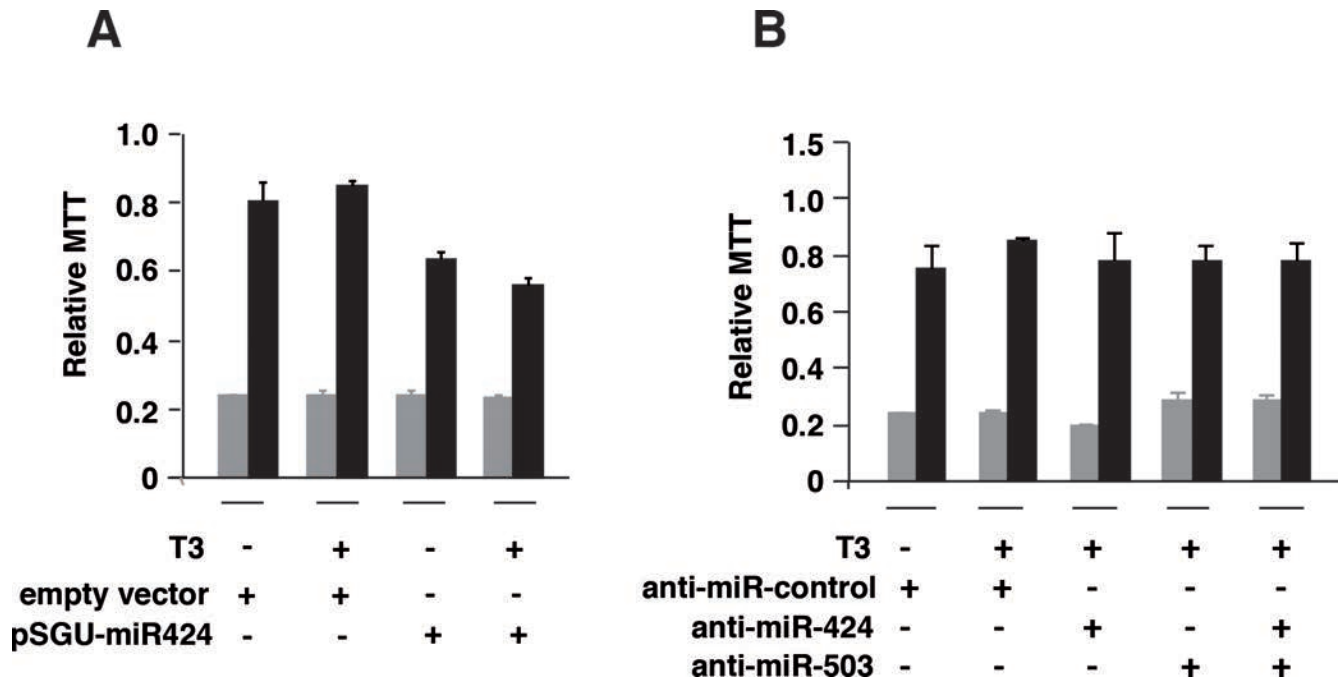

**Supplementary Figure S4:** (A) HepG2-TRb cells were transfected with the expression vector for miR424 or with an empty vector. After 24h were detached from the plates and grown in suspension under rocking conditions during an additional 24 h period in the presence and absence of T3. Cells were then plated and MTT was assayed. Results were expressed relative to MTT values obtained in cells inoculated in parallel without agitation. (B) HepG2-TRb cells were transfected with the indicated anti-miRNAs and after 24 h grown in suspension with and without T3 as indicated.

**PRIMERS AND ANTIBODIES****PRIMERS****Chk1 3'-UTR (+28953/+29193)**

Forward: 5'-CCA GAA GAT TTG GCT TCC TG-3'

Reverse: 5'-CCT TTC CCC AAA GTT TTG CT-3'

**Wee1 3'-UTR (+13948/+14644)**

Forward: 5'-TGA CAA GAG GAA GCT AGG TTG A-3'

Reverse: 5'-GAA AGG GTG CAT TTT TCC AA-3'

**APO**

Forward: 5'-AAG TGC TGT AGG CCA TTT AGA TTA G-3'

Reverse: 5'-AGT CTT CGA TGA CAG CGT ATA CAG A-3'

**miR424/503 promoter**

+59/-382

Forward: 5'-GGC TTC CTT CAG TCA TCC AG-3'

Reverse: 5'-GGA AAC AAT ACC CCA GAG CA-3'

-34/-923

Forward: 5'-AGA GGG CAT GCA TGT GAC TT-3'

Reverse: 5'-GCG GGT GAA TAA AGA CTG GA-3'

-910/-1793

Forward: 5'-GAC AAG ACG CCC CTT TGT AA-3'

Reverse: 5'-ATG CAT GCC CTC TTT TTG TT-3'

-1773/-2574

Forward: 5'-AAC CTT TGC AAA AAG CTT GC-3'

Reverse: 5'-TTA CAA AGG GGC GTC TTG TC-3'

**miR424/503 promoter (ChIP assays)**

-244/-84

Forward: 5'-TCA CCC ACT ACG TTG TTC CA

Reverse: 5'-GGC AAG GAA TAG GGC AAA AC

-330/-181

Forward: 5'-TTG CCT CTA CTT AAC CTT ATT CGT C

Reverse: 5'-AGC CGA AAG TGT GGC TCT C

-3723/-3911

Forward: 5'-GAA AGA ACG GTA CAA CGA ACG

Reverse: 5'-TTG AAG ATG CAT GCT GAA GTG

**ANTIBODIES**

| Antibody | Dilution | Use | Provider            |
|----------|----------|-----|---------------------|
| CDK-6    | 1:500    | WB  | Sigma-Aldrich C8343 |
| WEE1     | 1:1000   | WB  | Santa Cruz sc-9037  |
| CDC25A   | 1:500    | WB  | Santa Cruz sc-7389  |

(Continued)

| <b>Antibody</b> | <b>Dilution</b> | <b>Use</b> | <b>Provider</b>         |
|-----------------|-----------------|------------|-------------------------|
| CyclinD2        | 1:500           | WB         | Santa Cruz sc-56305     |
| MYB             | 1:500           | WB         | Pierce MA5-12339        |
| CHK1            | 1:1000          | WB         | Novus Biologicals 19210 |
| E2F3            | 1:1000          | WB         | Santa Cruz sc-878       |
| ERK2            | 1:1000          | WB         | Santa Cruz sc-154       |
| TR $\beta$      | 5 $\mu$ g       | ChIP       | Santa Cruz sc-737       |
| NCoR            | 5 $\mu$ g       | ChIP       | Santa Cruz sc-8994      |
| CBP             | 5 $\mu$ g       | ChIP       | Santa Cruz sc-369       |
| p/CIP           | 5 $\mu$ g       | ChIP       | Santa Cruz sc-9119      |
| SRC-1           | 5 $\mu$ g       | ChIP       | Santa Cruz sc-6096X     |
| Ac-H4           | 5 $\mu$ g       | ChIP       | Millipore 06-866        |
